# Supplementary material for: Ultra-low loadings of gold nanoparticles significantly boost capacitive energy storage of multilayer polymer composites
Source: Royal Society of Chemistry journal article supplement (doi:10.1039/d4tc04161e), 2024-11-05
Supplement: d4tc04161e1.pdf [file d4tc04161e1.pdf]

## Supplementary Information

### Ultra-low loadings of gold nanoparticles significantly boost capacitive energy storage of multilayer polymer composites

Yihui Qian<sup>a</sup>, Houmeng Du<sup>a</sup>, Li Lei<sup>a</sup>, Shuimiao Xia<sup>a</sup>, Yuchao Li<sup>b</sup>, Davoud Dastan<sup>c</sup>, Zhicheng Shi<sup>\*a</sup>

*a School of Materials Science and Engineering, Ocean University of China, Qingdao 266100, China*

*b School of Materials Science and Engineering, Liaocheng University, Liaocheng 252059, China*

*c Department of Materials Science and Engineering, Cornell University, Ithaca, NY, 14850, USA*

\*Corresponding author: Zhicheng Shi

*E-mail: zeshi@ouc.edu.cn (Z. Shi)*

#### Keywords:

Polymer films; Energy storage; Breakdown strength; Dielectric property

The calculation method of the volume fraction of Au nanoparticles is as follows:  
P(VDF-HFP) and PMMA samples were cut into circular films with a radius of 1 cm, the thickness of the polymer film as  $d$ , the volume of polymer film is  $V_1$ ,  $V_1=\pi r^2 d$ . The mass of P(VDF-HFP) is  $m_1$ , the mass of P(VDF-HFP) after sputtering is  $m_2$ , the density of gold nanoparticles is  $19.32 \text{ g/cm}^3$ , the volume of gold nanoparticles is  $V_2$ ,  $V_2=(m_2-m_1)/19.32$ , the volume fraction of gold nanoparticles is Au vol%, Au vol%= $V_2/(V_1+V_2)$ .

The surface SEM images and the size distribution of the Au NPs for the composite films. Gold nanoparticles are uniformly distributed with a size of about 6-10 nm with gold sputtering times of 4 min.

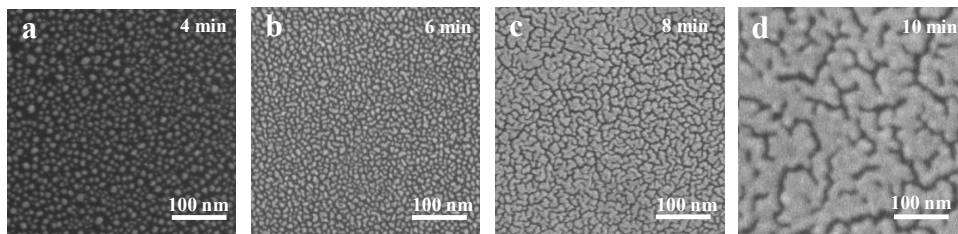

**Fig. S1.** The surface SEM image of P(VDF-HFP) films with different gold sputtering times.

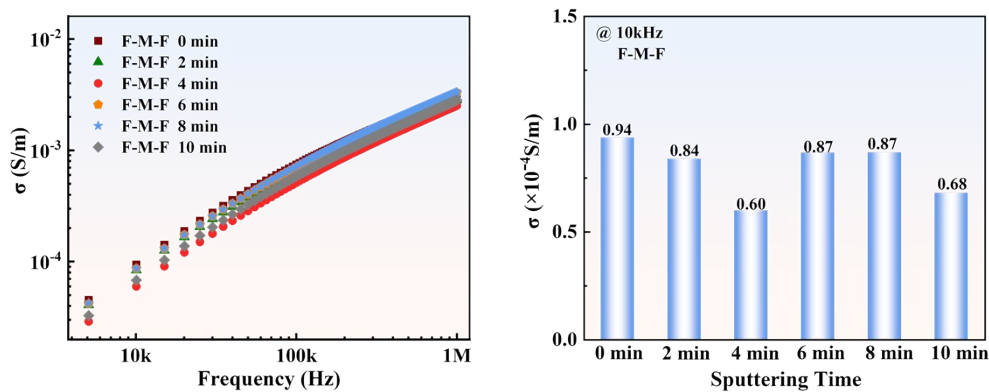

**Fig. S2** Frequency dependence of F-M-F films conductivity with different gold sputtering times.

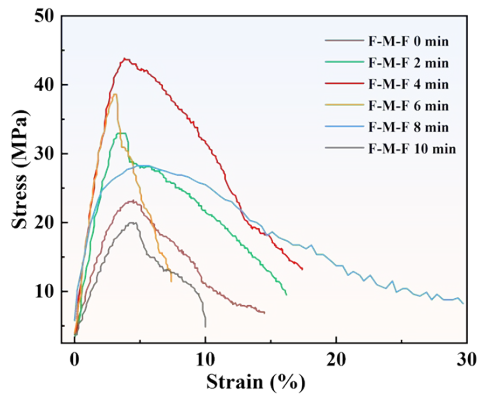

**Fig. S3** Strain-stress curves of F-M-F films with different gold sputtering times.

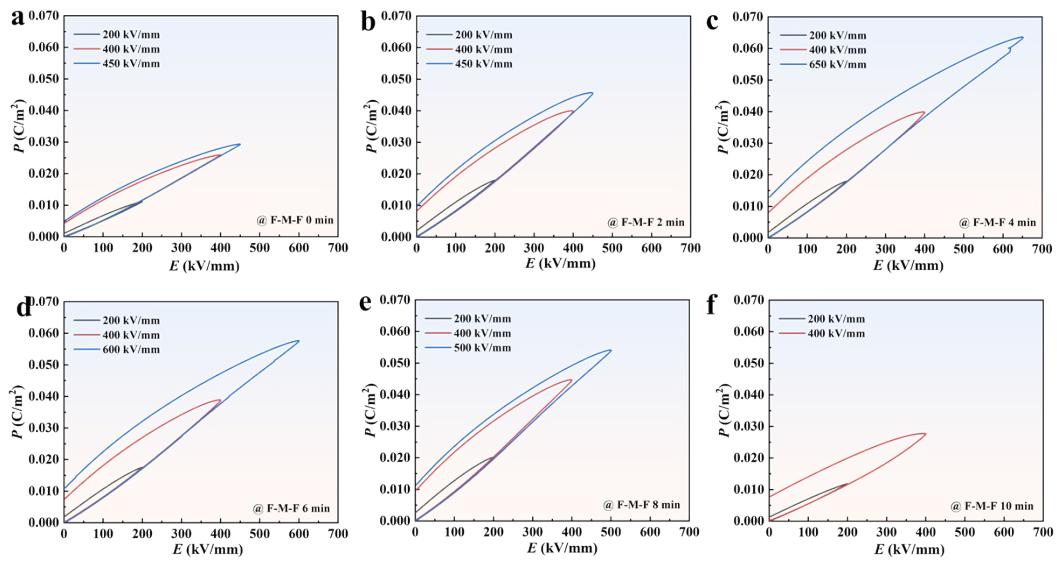

**Fig. S4** *D-E* loops of F-M-F films with different gold sputtering times.
